# Supplementary material
Source: PubMed Central journal article supplement (PMC2586727)
Supplement: JCI0834472sd.pdf [file JCI0834472sd.pdf]

## **Supplemental Methods:**

### **Hemodynamic and Blood Pressure measurements**

For hemodynamics measurements, adult mice were anesthetized with ketamine/xylazine and cardiac contractile and relaxation parameters were assessed, as previously described (Arber et al., 1997). Blood pressure measurements were performed in trained awake mice using the tail-cuff method as previously described (Chen et al., 2008).

### ***In vitro* cardiac muscle model of load-induced hypertrophy**

Right ventricular papillary muscles were isolated and mounted in a cardiac tissue culture chamber containing oxygenated modified HEPES buffered solution containing (in mM): 137.2 NaCl, 15.0 KCl, 1.2 MgCl<sub>2</sub>, 2.8 Na-Acetate, 10 Taurine, 1.0 CaCl<sub>2</sub>, 10.0 mM Glucose, and 10 mM HEPES in equilibrium with 100% O<sub>2</sub>. Calcium concentration was increased in the solution to 1.80mM, and subsequently replaced with a modified M199 cell culture media containing (in mM): 2.0 L-carnitine, 5.0 creatine, 5.0 taurine, 2.0 L-glutamine, 0.2% albumin, 100 IU/ml penicillin, 0.1 mg/ml streptomycin, and 10mM HEPES in equilibrium with 5% CO<sub>2</sub> and 95% O<sub>2</sub>, at 34°C and pH ~7.4. Muscles were initially left at slack length and stimulated at 0.2 Hz at a voltage 15% above threshold for a period of one hour. When active forces stabilized, the stimulation frequency was increased to 1 Hz. Systolic and diastolic forces were measured to monitor muscle viability for the experimental duration. To obtain stress-strain data, titanium dioxide markers were arrayed on the surface of muscles. During continuous stretch of the muscle, local uniaxial muscle deformations were recorded using a CCD camera, and correlated with the acquired force data, as previously described (Knoll et al., 2002; Lorenzen-Schmidt et al., 2005).

## **Supplemental References:**

1. Arber, S., et al. 1997. MLP-deficient mice exhibit a disruption of cardiac cytoarchitectural organization, dilated cardiomyopathy, and heart failure. *Cell* **88**: 393-403.
2. Chen, Y., et al. 2008. Common genetic variants in the chromogranin A promoter alter autonomic activity and blood pressure. *Kidney Int.* **74**:115-125.

3. Knoll, R., et al. 2002. The cardiac mechanical stretch sensor machinery involves a Z disc complex that is defective in a subset of human dilated cardiomyopathy. *Cell* **111**: 943-955.
4. Lorenzen-Schmidt, I., McCulloch, A.D. and Omens, J.H. 2005. Deficiency of actinin-associated LIM protein alters regional right ventricular function and hypertrophic remodeling. *Ann. Biomed. Eng.* **33**: 888-896.

|                            | <b>WT</b><br>(n=3) | <b>KO</b><br>(n=5) |
|----------------------------|--------------------|--------------------|
| <b>Systolic BP (mmHg)</b>  | 130 ± 4.1          | 134 ± 8.8          |
| <b>Diastolic BP (mmHg)</b> | 97 ± 4.0           | 107 ± 8.1          |
| <b>Pulse rate (bpm)</b>    | 664 ± 32           | 672 ± 21           |

**Supplemental Table 1. Blood pressure measurement assessment in wild type and *Fhl1* deficient mice.** Blood pressure (BP) and heart rate were determined in trained awake mice using the tail-cuff method as previously described (Chen et al., 2008). No significant differences in systolic BP, diastolic BP and pulse rate were observed between wild type (WT) and *Fhl1*<sup>-/-</sup> (KO) mice.

|                              | <b>WT SHAM</b><br>n=4 | <b>WT TAC-5w</b><br>n=7 | <b>KO SHAM</b><br>n=4 | <b>KO TAC-5w</b><br>n=8 |
|------------------------------|-----------------------|-------------------------|-----------------------|-------------------------|
| <b>LV +dP/dt</b><br>(mmHg/s) | 9285 ± 1068           | 6592 ± 821*             | 9569 ± 317            | 8534 ± 1152             |
| <b>LV -dP/dt</b><br>(mmHg/s) | 8371 ± 1313           | 8413 ± 1002             | 7865 ± 395            | 10885 ± 914*            |
| <b>EXP <math>\tau</math></b> | 11.0 ± 0.4            | 10.7 ± 1.3              | 11.1 ± 0.8            | 8.1 ± 0.8*              |
| <b>LVEDP</b><br>(mmHg)       | 11.1 ± 1.3            | 16.7 ± 2.5*             | 11.7 ± 2.3            | 11.4 ± 2.0              |
| <b>PG</b> (mmHg)             |                       | 95.3 ± 40               |                       | 98.2 ± 33               |
| <b>LV/BW ratio</b><br>(mg/g) | 0.37 ± 0.0001         | 0.53 ± 0.0002*          | 0.37 ± 0.0003         | 0.42 ± 0.0003           |

**Supplemental Table 2. Hemodynamic measurement of contractile parameters within wild type (WT) and *Fhl1* deficient (KO) mouse hearts after 5 weeks of TAC.** LV dP/dt, left ventricular maximum (+dP/dt) and minimum (-dP/dt) first derivatives of LV pressure; LVEDP, left ventricular end diastolic pressure;  $\tau$ , time constant of relaxation (using an exponential function), PG, trans-aortic pressure gradient; LV/BW ratio, left ventricular to body weight ratio. \* p<0.05.

|                | <b>Primer sequences and Template</b>                                                                                                |
|----------------|-------------------------------------------------------------------------------------------------------------------------------------|
| FHL1 (4.5 LIM) | F (EcoRI): ATGTCGGAGAAGTTCTCGACT<br>R (BamHI): TTACAGCTTTTTGGCACAGTCAG<br>Template RefSeq acc. no.: NM_010211                       |
| FHL1 (3.5 LIM) | F (EcoRI): ATGTCGGAGAAGTTCTCGACT<br>R2 (BamHI): AGTGATGGGGTTCTTGCATCCA<br>Template RefSeq acc. no.: NM_010211                       |
| FHL1 (2 LIM)   | F (EcoRI): GCTACTCGGGAGGACTCCC<br>R (BamHI): AGTGATGGGGTTCTTGCATCCA<br>Template RefSeq acc. nos.: NM_010211 and NM_001077361        |
| FHL1 (1.5 LIM) | F (EcoRI): ATGTCGGAGAAGTTCTCGACT<br>R (BamHI): GCCCTTGACTCCACGTT<br>Template RefSeq acc. nos.: NM_010211 and NM_001077361           |
| FHL1 (KyoT2)   | F (EcoRI): ATGTCGGAGAAGTTCTCGACT<br>R (BamHI): TCACGGAGCATTTTTTGCAGTGGAAG<br>Template RefSeq acc. no.: NM_001077361                 |
| Raf1           | F (EcoRI): ATGGAGCACATACAGGGA<br>R (SacI): CTAGAAGACTGGTAGCCTTGG<br>Template RefSeq acc. no.: NM_029780.3                           |
| MEK1           | F (BamHI): ATGCCCAAGAAGAAGCCGACG<br>R (SacI): TCAGATGCTGGCAGCGTGGGT<br>Template RefSeq acc. no.: NM_008927.3                        |
| MEK2           | F (BamHI): ATGCTGGCCCGGAGGAAGCCG<br>R (SacI): TCACACTGCAGTCCGCGTGGG<br>Template RefSeq acc. no.: NM_023138.3                        |
| ERK2           | F (BamHI): ATGGCGGCGGCGGCGGCGGCGGCG<br>R (XhoI): CTGTGATGGAGATCCAAGAAT<br>Template RefSeq acc. nos.: NM_011949.3 and NM_001038663.1 |
| ERK2 (TYDD)    | GATCACACAGGGTTCTTGgacGAGgACGTAGCCACACGTTGGTACAG (lower case letters denote the mutations)<br>Template: pACT2-ERK2                   |

**Supplemental Table 3. Primer sequences and reference templates used to generate FHL1, Raf1, MEK1/2 and ERK2 hybrid genes for yeast-two hybrid assays.** Primer sequences are shown from 5'→3' and designed as follows. Forward (F) primers were designed to incorporate two random nucleotides, a linker restriction site and one random nucleotide to be in frame with vector, as well as the Kozak sequence: gccacc and a START codon (if not present within cDNA). Reverse (R) primers were designed to incorporate two random nucleotides, a linker restriction site and STOP codon if not present within cDNA.
